# Supplementary material for: A guest-dependent thermochromic feature in a metal–organic framework and its thin film on different supports
Source: Royal Society of Chemistry journal article supplement (doi:10.1039/c4ta01597e), 2014-01-01
Supplement: c4ta01597e1.pdf [file c4ta01597e1.pdf]

## **Guest-dependent thermochromic feature in metal-organic framework and its thin film on different supports fabricated by seeded growth approach**

Ping-Chun Guo,<sup>a, b</sup> Tian-Ru Chen,<sup>a, b</sup> Xiao-Ming Ren,<sup>\*a, b</sup> Zhenyu Chu,<sup>a</sup> Wanqin Jin<sup>\*a</sup>

<sup>a</sup>State Key Laboratory of Materials-Oriented Chemical Engineering, Nanjing University of Technology, Nanjing 210009, P.R. China

<sup>b</sup>College of Science, Nanjing University of Technology, Nanjing 210009, P. R. China

Tel.: +86 25 58139476

Fax: +86 25 58139481

E-mail: [xmren@njut.edu.cn](mailto:xmren@njut.edu.cn) (X.M.R.) and [wqjin@njut.edu.cn](mailto:wqjin@njut.edu.cn) (W.Q.J.)

## Experimental section

### Materials

1, 1'-ethynebenzene-3, 3', 5, 5'-tetracarboxylate (H<sub>4</sub>EBTC) was prepared according the literatures [1]. Copper (II) dinitrate trihydrate (Cu(NO<sub>3</sub>)<sub>2</sub>·3H<sub>2</sub>O, Fluka, 98%) and copper (II) acetate monohydrate (Cu(CH<sub>3</sub>COO)<sub>2</sub>·H<sub>2</sub>O, Shanghai Sinpeuo Fine Chemical Co., Ltd., 99%) were used without further purification. DMF and DMSO were employed as solvents.

### Synthesis of MOF crystal

[Cu<sub>2</sub>(EBTC)(H<sub>2</sub>O)<sub>2</sub>·G] (**1**) was prepared following the published procedure [2]. [Cu<sub>2</sub>(EBTC)(H<sub>2</sub>O)<sub>2</sub>][(H<sub>2</sub>O)<sub>x</sub>(CH<sub>3</sub>OH)<sub>y</sub>] (**2**) was obtained by soaking **1** in methanol for 24 h at ambient temperature and then refreshing for three times.

### Seed deposition

The substrate is porous alumina disk with an average pore size of ca. 110 nm and about 35% porosity. One side of the substrate was polished using 1200-mesh SiC sandpaper, washed using abundant deionized water and dried before seeding. The polished side of the substrate was sequentially processed (1) dipping in DMF/DMSO solution with 1 mM H<sub>4</sub>EBTC in a volume ratio of 1:1 for 30 min (2) washing with the DMF/DMSO solvents (3) dipping in DMF/DMSO solution with 1 mM Cu(CH<sub>3</sub>COO)<sub>2</sub>·H<sub>2</sub>O for 20 min and (4) washing with the DMF/DMSO solvents. The procedures from (1) to (4) were repeated for a substrate several times, and the substrate with seed layer was dried at 50 °C in vacuum for 30min for the fabrication of the film.

### Film fabrication

H<sub>4</sub>EBTC (17.7mg) and Cu(NO<sub>3</sub>)<sub>2</sub>·3H<sub>2</sub>O (53.3mg) were dissolved in DMF (2.5ml) and DMSO (2.5ml), and a drop of 1M HNO<sub>3</sub> in DMF was added to the nixed solution. The solution was directly transferred into a 25 ml Teflon-lined autoclave in which the seeded substrate was horizontally stood in the bottom of autoclave for growth of **F-1**. The autoclave was cooled to ambient temperature with a cooling rate of 20 °C·h<sup>-1</sup> after crystallization at 65 °C for 24 h. The as-prepared films were cleaned with DMF/DMSO and cleanly stored after drying at 25 °C under vacuum for 12 h. The

[Cu<sub>2</sub>(EBTC)(H<sub>2</sub>O)<sub>2</sub>][(H<sub>2</sub>O)<sub>x</sub>(CH<sub>3</sub>OH)<sub>y</sub>] film (**F-2**) was obtained by soaking **F-1** in CH<sub>3</sub>OH solvent for 24 h and drying at ambient temperature.

### Characterization

The UV-visible spectra were carried using an UV-vis spectrophotometer (Shimadzu UV-2401TC). The crystalline phases of the Cu-EBTC film was determined using Powder X-ray diffractometry (PXRD, D8-advance, Bruker, Germany) with Cu K $\alpha$  radiation ( $\lambda = 1.5418 \text{ \AA}$ ) in the range of  $5^\circ \leq 2\theta \leq 50^\circ$  at room temperature. The film morphologies were observed via scanning electron microscopy (SEM) (FEI, model Quanta-200, Holland) using gold-coated specimens to increase conductivity. TGA experiments were performed with STA449 F3 thermogravimetric analyzer in the 30-700 °C range at a warming rate of 10 °C/min under a nitrogen atmosphere and the polycrystalline samples were placed in an Al<sub>2</sub>O<sub>3</sub> crucible.

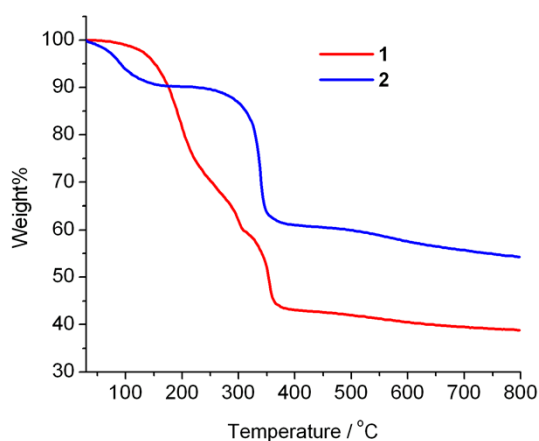

Figure S1 TGA plots of **1** and **2**

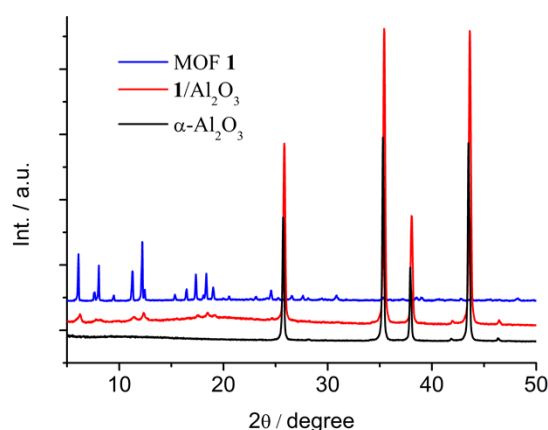

Figure S2 PXRD patterns of Al<sub>2</sub>O<sub>3</sub> support, **1** and the **1**/Al<sub>2</sub>O<sub>3</sub> film

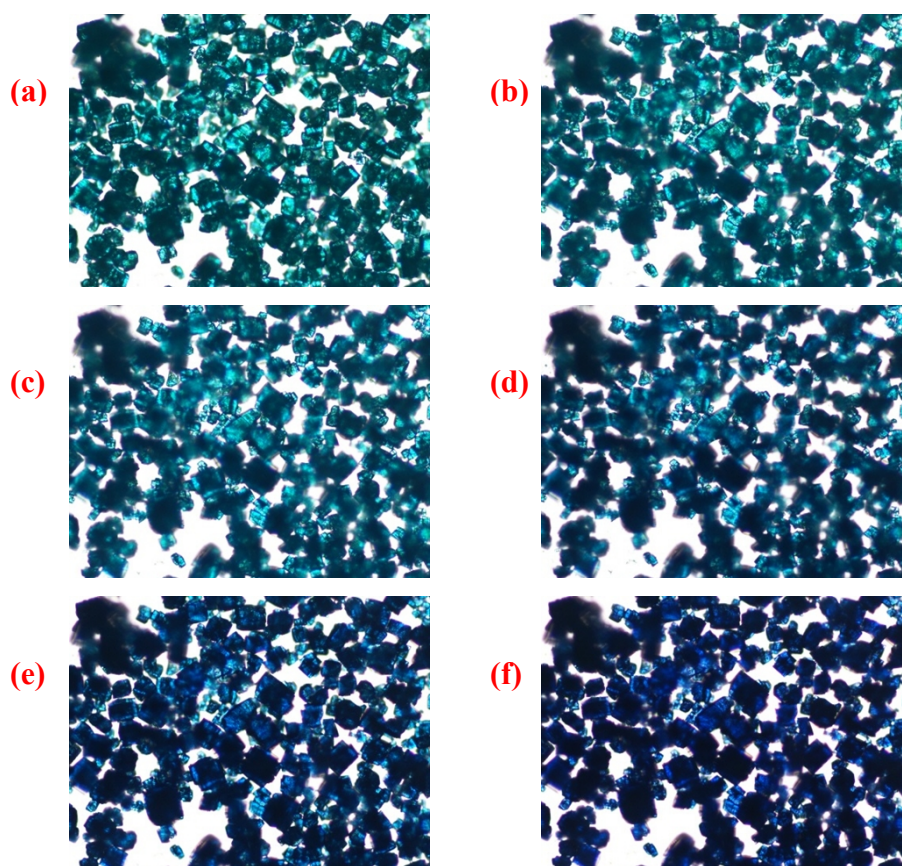

**Figure S3** Photographs of the **1** at (a) 25 °C (b) 120 °C (c) 140 °C (d) 160 °C (e) 180 °C and (f) 200 °C.

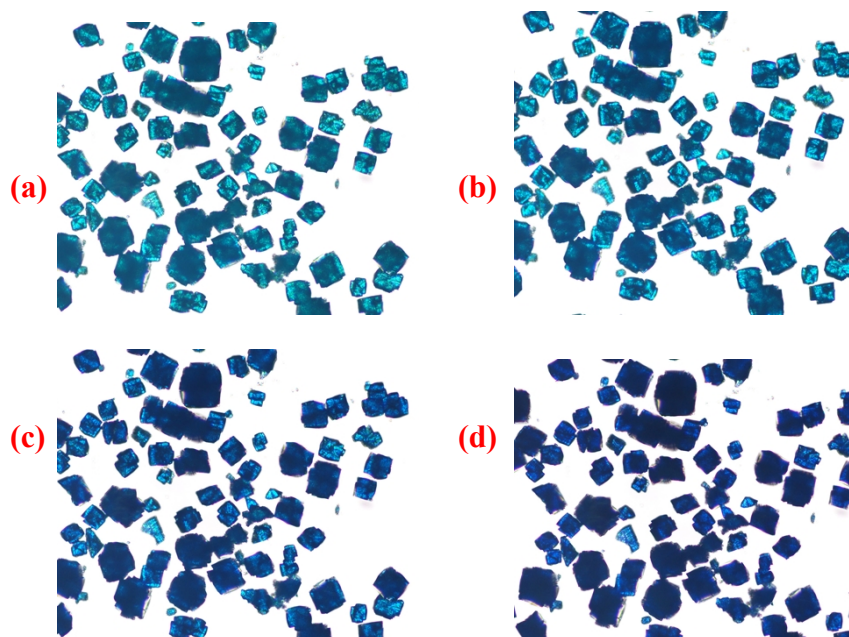

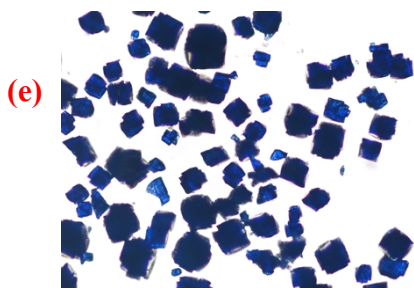

**Figure S4** Photographs of the **2** at (a) 25 °C (b) 30 °C (c) 40 °C (d) 50 °C and (e) 60 °C.

#### References

1. H. Zhou, H. Dang, J. H. Yi, A. Nanci, A. Rochefort and J. D. Wuest, *J. Am. Chem. Soc.*, 2007, **129**, 13774.
2. Y. X. Hu, S. C. Xiang, W. W. Zhang, Z. X. Zhang, L. Wang, J. F. Bai and B. L. Chen, *Chem. Commun.*, 2009, 7551.
